# Supplementary material for: Colloidal synthesis and characterization of single-crystalline Sb2Se3 nanowires
Source: Royal Society of Chemistry journal article supplement (doi:10.1039/c7ra03319b), 2017-01-01
Supplement: c7ra03319b1.pdf [file c7ra03319b1.pdf]

## **Colloidal synthesis and characterizations of single-crystalline Sb<sub>2</sub>Se<sub>3</sub> nanowires**

Yike Liu <sup>a, b</sup>, Yaqin Tang <sup>a</sup>, Ying Zeng <sup>a</sup>, Xun Luo <sup>a</sup>, Jingyu Ran <sup>a</sup>, Yongmei Luo <sup>a</sup>,  
Xiangdong Su <sup>a</sup>, Boon K. Ng <sup>c</sup>, Fangyang Liu \* <sup>b</sup> and Liangxing Jiang \* <sup>b</sup>

*a. School of Material and Metallurgical Engineering, Guizhou Institute of Technology, Guiyang 550003, China*

*b. School of Metallurgy and Environment, Central South University, Changsha 410083, China;*

*c. Faculty of ESTeM, University of Canberra, Bruce, ACT 2601, Australia*

Fax-Tel: +86 731 88830474;

Fax-Tel: +86 13975808172;

<sup>a</sup>E-mail: liufangyang@csu.edu.cn;

### **Electronic Supplementary Information**

---

## Experimental Details

### Preparation of Se/DMAB/OLA solution

5 mL OLA, 7.5 mL DMAB and 6 mmol Se powder (99.9%, Aladdin) were added into a two neck round bottomed flask (50 mL) connected to a Schlenk line (Fig. S1 (a)). Then the temperature was heated up to around 110°C under vacuum with stirring to dissolve Se powder. The temperature was kept constant for a few minutes, the color of mixture solution turned immediately from dark (Fig. S1 (b)) to colorless (Fig. S1 (c)). The temperature of the Se/DMAB/OLA solution was held constant at 90 °C.

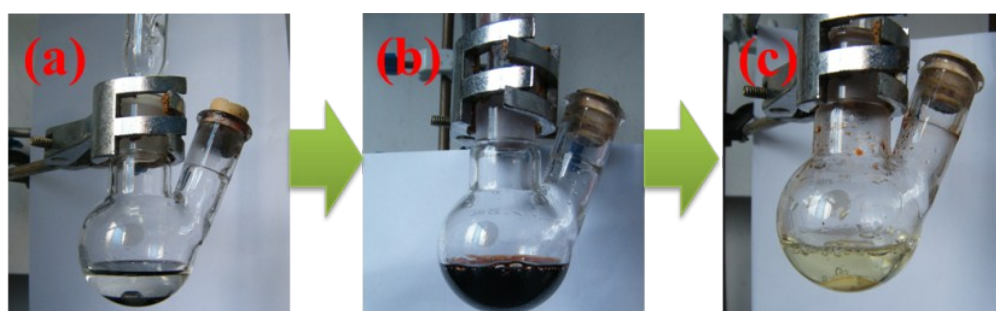

Fig. S1 The photographic image where a two necked round bottomed flask consisted of 6 mmol Se powders and 7.5 mL DMAB in 5 mL OLA (a) at room temperature, (b) at the start of the reduction reaction 110 °C, and (c) at the end of the reduction, Se/DMAB/OLA colorless solution.

### Synthesis of Sb<sub>2</sub>Se<sub>3</sub> nanowires

#### A. The use of antimony trichloride as Sb source

In a typical synthesis, 1.0 mmol of antimony trichloride (SbCl<sub>3</sub>) and 10 ml of oleylamine were added into a three-neck round bottomed flask (50 ml) connected to a Schlenk line (all chemicals were used as received from suppliers without any prior arrangements). The temperature was adjusted up to around 120°C under vacuum with stirring as well as degassing for about an hour and purging with Ar for 3 times. The flask was then heated to 180 °C, where 1.5 ml of 1.0 M solution of Se/DMAB in oleylamine was injected. After injection, the solution turned dark and the temperature was held at 180 °C for 30 minutes. After the reaction, the products were recovered from precipitation-dispersion cycles utilizing toluene and ethanol (1:3 v/v).

#### B. The use of antimony triacetate as Sb source

1.0 mmol of antimony triacetate (Sb(CH<sub>3</sub>COO)<sub>3</sub>) and 10 ml of oleylamine were added into a three-neck round bottomed flask (50 ml) connected to a Schlenk line (all chemicals were used as

---

received from suppliers without any prior arrangements). The temperature was adjusted up to around 120°C under vacuum with stirring as well as degassing for about an hour and purging with Ar for 3 times. The flask was then heated to 190 °C, where 1.7 ml of 1.0 M solution of Se/DMAB in oleylamine was injected. After injection, the solution turned dark and the temperature was held at 190 °C for 30 minutes. After the reaction, the products were recovered from precipitation-dispersion cycles utilizing toluene and ethanol (1:3 v/v).

### **Preparation for Sb<sub>2</sub>Se<sub>3</sub> nanowires films**

0.2-0.3 mL of ink (using a toluene solution of Sb<sub>2</sub>Se<sub>3</sub> nanowires) was drop-casted onto a sodalime glass (SLG) with an area of 2.40 cm<sup>2</sup>. The sample was then put in a draught cupboard so that the solvent evaporated naturally. Consequently, a dense Sb<sub>2</sub>Se<sub>3</sub> nanowires thin film was formed on the SLG. On the other hand, the Sb<sub>2</sub>Se<sub>3</sub> nanowires films on an ITO glass were also prepared and the nanocrystals films were served as working electrodes in photoelectrochemical (PEC) test. 0.2-0.3 mL of ink (using a toluene solution of Sb<sub>2</sub>Se<sub>3</sub> nanowires) was drop-casted onto an ITO glass with an area of 1.96 cm<sup>2</sup>. The sample was then put into a draught cupboard so that the solvent evaporated naturally. After that, the samples were dried at 100 °C under vacuum for 8 hours to remove the ligands and to improve the conductivity of the Sb<sub>2</sub>Se<sub>3</sub> nanowires films.

### **Materials Characterizations**

The synthesized Sb<sub>2</sub>Se<sub>3</sub> nanowires were characterized by transmission electron microscopy (TEM) and selected area electron diffraction (SAED) via JEM 2100F microscope. The crystal structure and chemical composition were characterized by X-ray diffraction (Rigaku 3014) and energy-dispersive X-ray spectroscopy (EDAX-GENESIS60S) using a dried thin film samples prepared by drop-casting the nanocrystal-ink, respectively. The Raman spectra was taken by using a LabRAM ARAMIS spectrometer. UV-vis-NIR spectra were carried out to evaluate the optical properties of Sb<sub>2</sub>Se<sub>3</sub> nanowires using UV-vis-NIR HITACHI U-4100 spectrophotometer. The photoelectrochemical characterization of the film was carried out in 0.5 M H<sub>2</sub>SO<sub>4</sub> solution in a Pyrex electrolytic cell. Where the sample, a purity graphite plate, and a saturated calomel electrode (SCE) were used as the working, counter and reference electrodes, respectively. A 300 W xenon lamp was used as light source, with the light intensity kept at 100 mW/cm<sup>2</sup>.

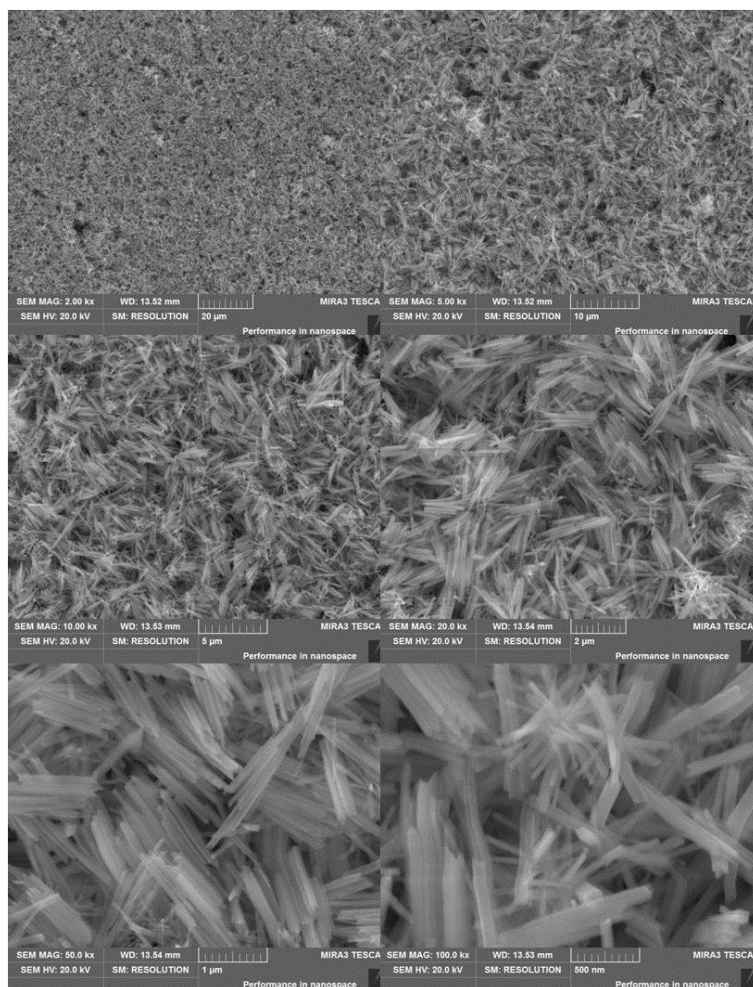

Fig. S2 Additional SEM images for synthesized  $\text{Sb}_2\text{Se}_3$  nanowires at different magnitudes.

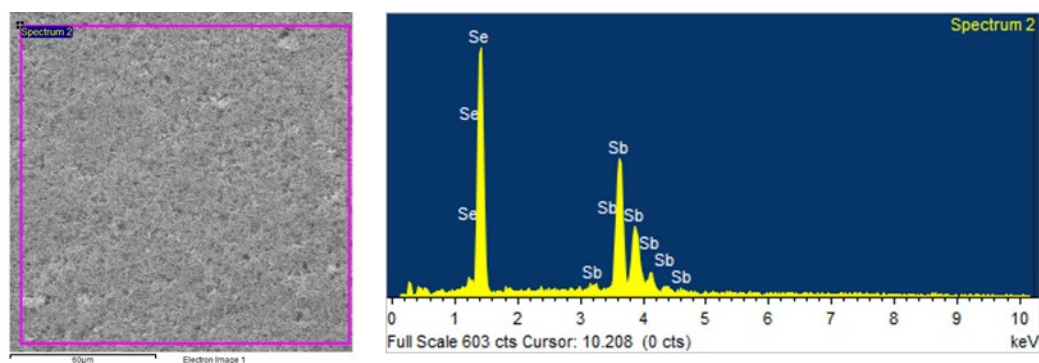

Fig. S3 Representative energy dispersive X-ray spectroscopy spectrum for  $\text{Sb}_2\text{Se}_3$  nanowires and the quantitative analysis

The sample used for determining the quantitative composition of  $\text{Sb}_2\text{Se}_3$  film by EDX was prepared by dropping the concentrated dispersion of  $\text{Sb}_2\text{Se}_3$  nanocrystal-ink onto the soda-lime glass substrate. In order to get average composition of synthesized nanocrystals, 3 different area of nanocrystal film were examined. The average composition of synthesized nanocrystal is

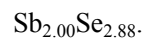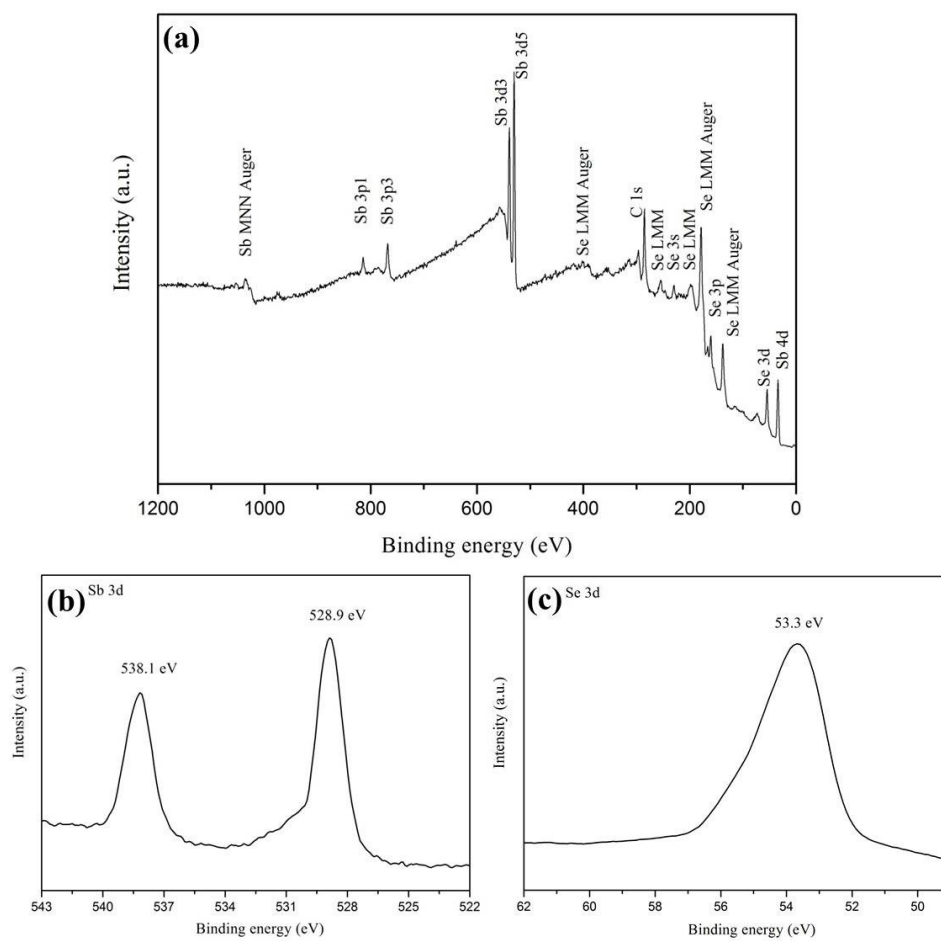

Fig. S4 XPS spectra of as-synthesized  $\text{Sb}_2\text{Se}_3$  nanowires. (a) The comprehensive scanning spectrum, (b) Sb 3d spectrum, and (c) Se 3d spectrum.

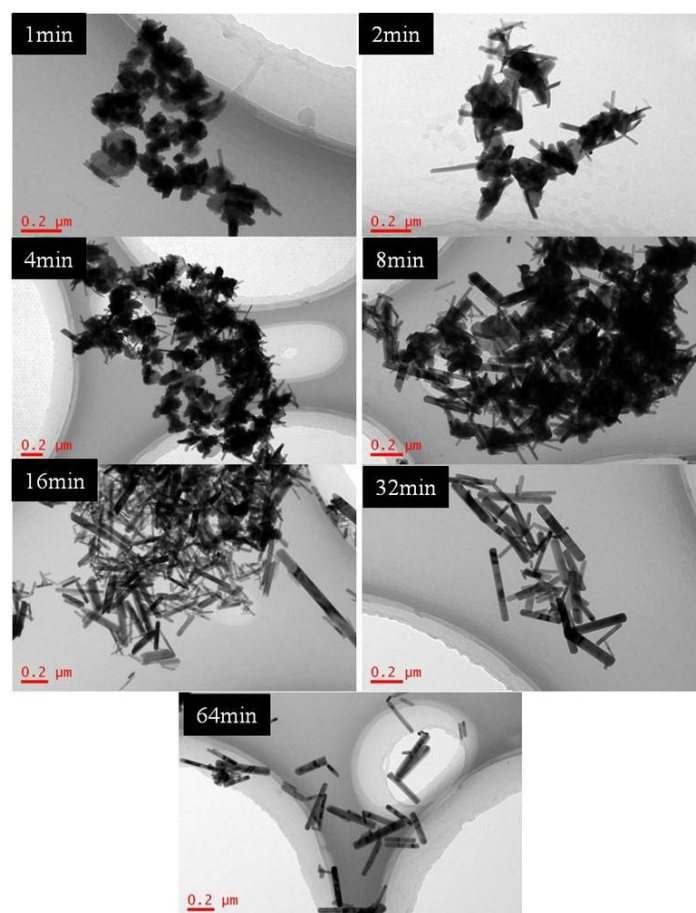

Fig. S5 TEM images for each aliquots taken out at different time (a) 1min, (b) 2min, (c) 4min, (d) 8min, (e) 16min, (f) 32min, (g) 64min.

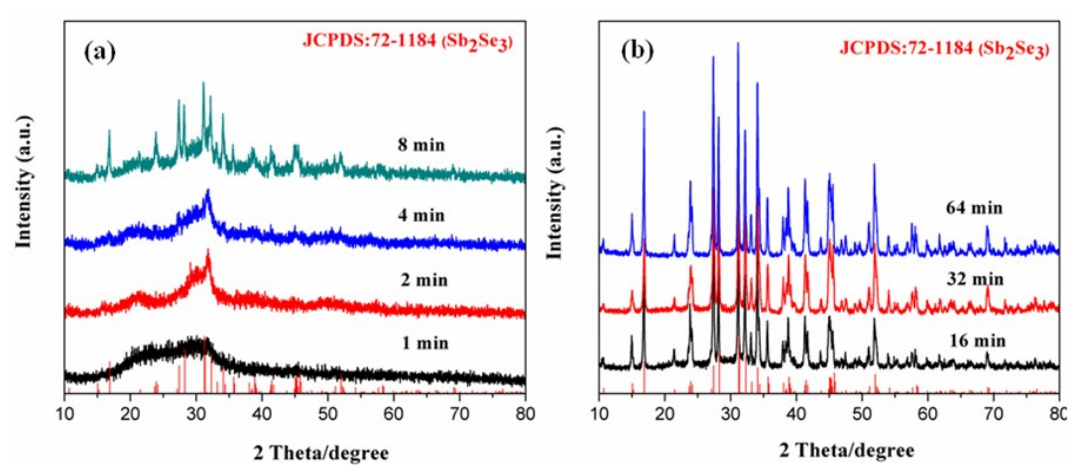

Fig. S6 XRD spectra of each aliquots taken out at different time.



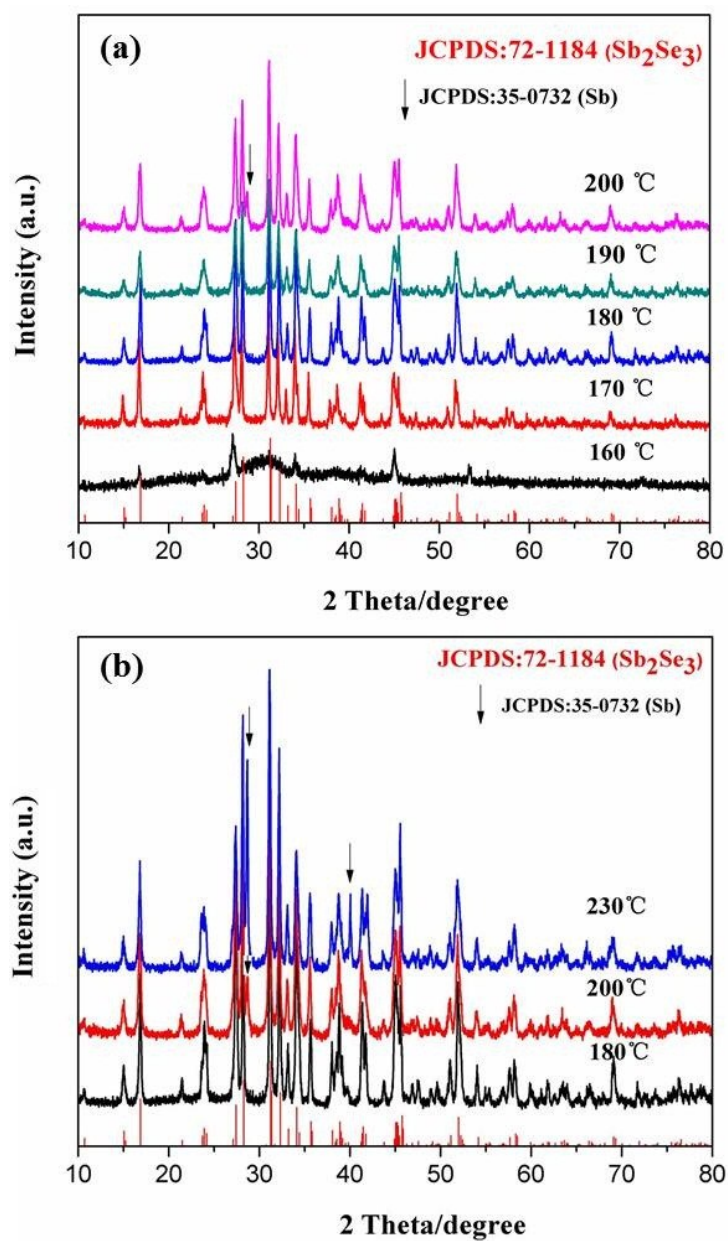

Fig. S7 XRD patterns for synthesized product at different temperature for 30 min using antimony chloride as the Sb source.

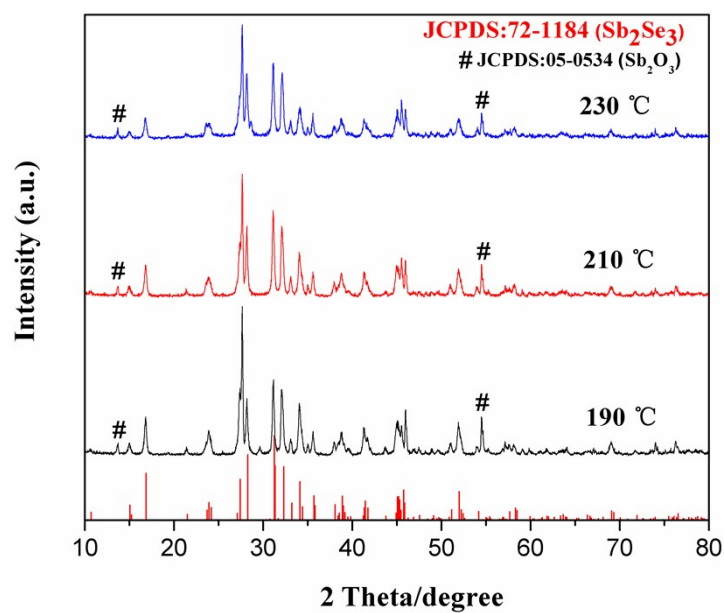

Fig. S8 XRD patterns for synthesized product at different temperature for 30 min using antimony triacetate as the Sb source (Sb:Se=1:1.5).

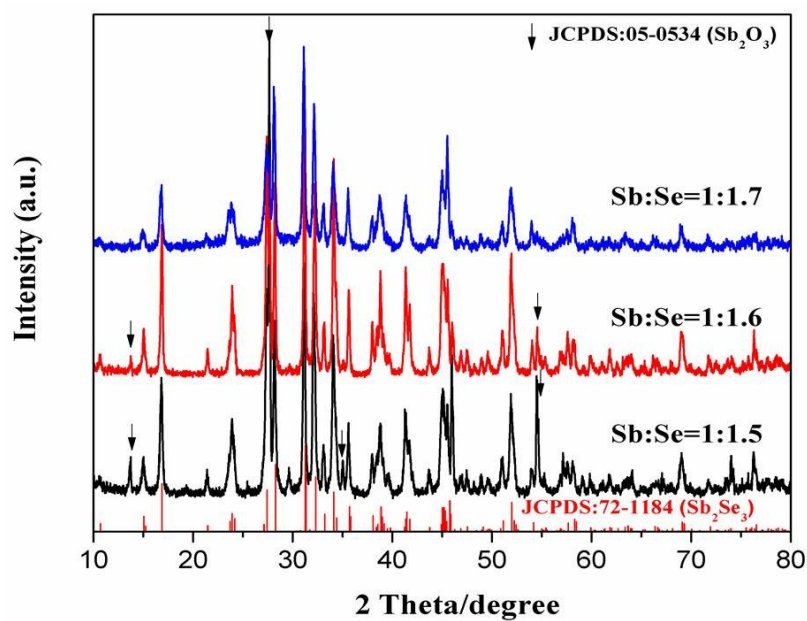

Fig. S9 XRD patterns for synthesized product at different ratios of precursors (Sb: Se) 190 °C for 30 min using antimony triacetate as the Sb source.
